# Supplementary material for: Ultrasensitive detection of pectin based on the decarboxylation reaction and surface-enhanced Raman spectroscopy
Source: Royal Society of Chemistry journal article supplement (doi:10.1039/d2ay00463a), 2022-01-01
Supplement: d2ay00463a1.pdf [file d2ay00463a1.pdf]

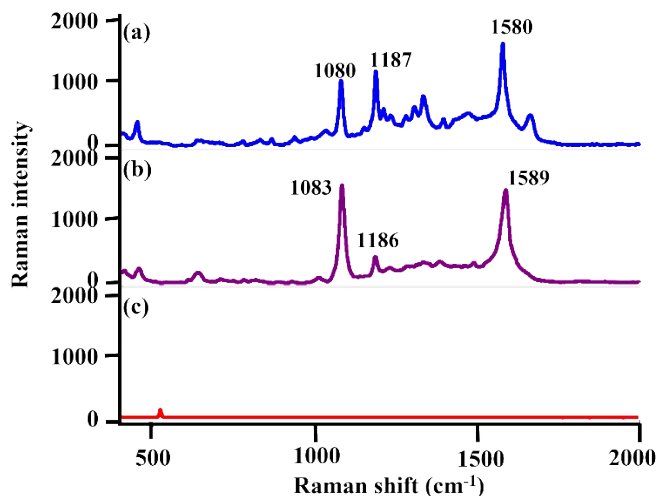

Fig. S1 SERS spectra of furfural standard (a), D-Gal-A derivative solution (b) and substrate (c).

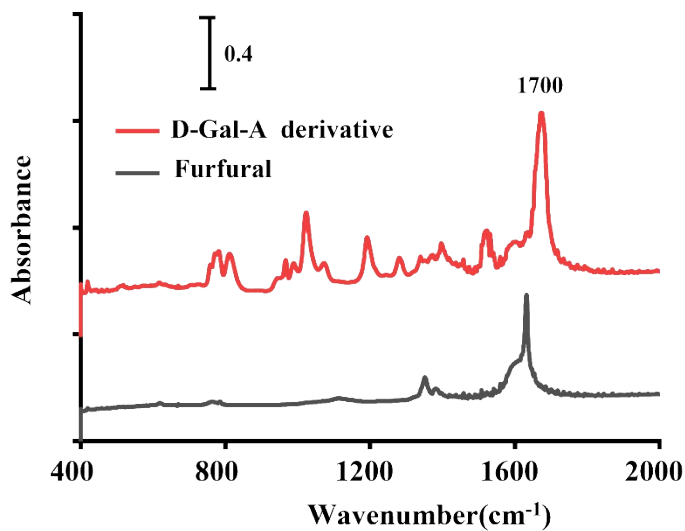

Fig. S2 FT-IR spectra of furfural standard and D-Gal-A derivatives

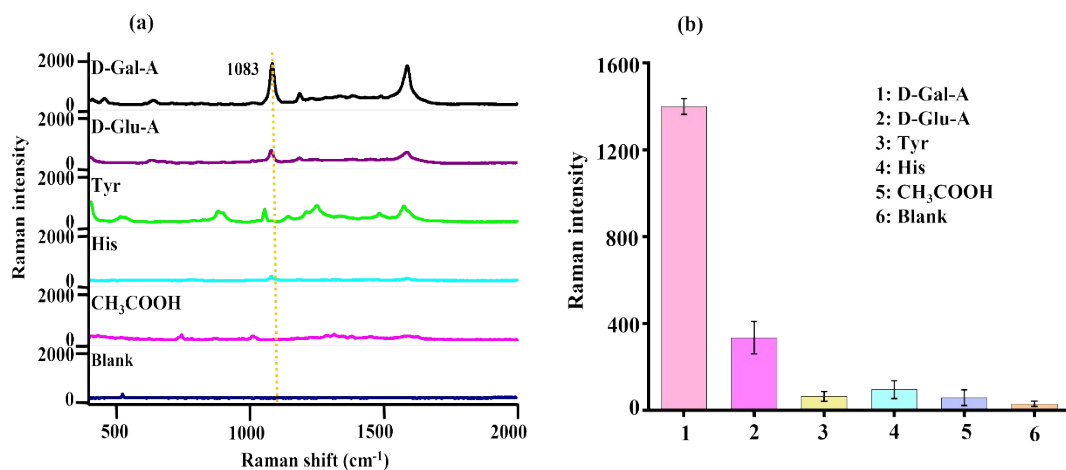

Fig. S3 Typical SERS spectra of D-Gal-A derivatives and interfering substances (1-6: D-Gal-A, D-Glu-A,

Tyr, His, CH<sub>3</sub>COOH, Blank) (a), Selectivity of the method with different interfering substances (b).
